1 **Suggested running title:**

2 MdBT2 modulates malate accumulation in response to nitrate

3

4 **The Title:**

5 BTB-TAZ domain protein MdBT2 modulates malate accumulation by targeting a

6 bHLH transcription factor for degradation in response to nitrate

7

8 **The full names of all the authors:**

9 Quan-Yan Zhang<sup>1</sup>, Kai-Di Gu<sup>1</sup>, Lailiang Cheng<sup>2</sup>, Jia-Hui Wang<sup>1</sup>, Jian-Qiang Yu<sup>1</sup>,

10 Xiao-Fei Wang<sup>1</sup>, Chun-Xiang You<sup>1</sup>, Da-Gang Hu<sup>1,2\*</sup>, Yu-Jin Hao<sup>1\*</sup>

11

12 **The names and address of the institution:**

13 <sup>1</sup>National Key Laboratory of Crop Biology, Shandong Collaborative Innovation

14 Center of Fruit & Vegetable Quality and Efficient Production, College of Horticulture

15 Science and Engineering, Shandong Agricultural University, Tai-An, Shandong

16 271018, China

17 <sup>2</sup>Department of Horticulture, Cornell University, 134A Plant Science, Ithaca, NY

18 14853, USA

19

20 **Corresponding authors:**

21 Yu-Jin Hao (haoyujin@sdau.edu.cn), Da-Gang Hu (fap\_296566@163.com)

22 Tel: +86-538-824-6692

23 Fax number: +86-538-824-2364

24 Address: College of Horticulture Science and Engineering, Shandong Agricultural

25 University, Tai-An, Shandong 271018, China

26

27 **Keywords:**

28 Apple; Nitrate; *MdBT2*; *MdCibHLH1*; Malate accumulation

29

30 **BTB-TAZ domain protein MdBt2 modulates malate accumulation**  
31 **by targeting a bHLH transcription factor for degradation in response**  
32 **to nitrate**

33 **Quan-Yan Zhang<sup>1</sup>, Kai-Di Gu<sup>1</sup>, Lailiang Cheng<sup>2</sup>, Jia-Hui Wang<sup>1</sup>, Jian-Qiang Yu<sup>1</sup>,**  
34 **Xiao-Fei Wang<sup>1</sup>, Chun-Xiang You<sup>1</sup>, Da-Gang Hu<sup>1,2\*</sup>, Yu-Jin Hao<sup>1\*</sup>**

35

36 <sup>1</sup>National Key Laboratory of Crop Biology, Shandong Collaborative Innovation  
37 Center of Fruit & Vegetable Quality and Efficient Production, College of Horticulture  
38 Science and Engineering, Shandong Agricultural University, Tai-An, Shandong  
39 271018, China

40 <sup>2</sup>Department of Horticulture, Cornell University, 134A Plant Science, Ithaca, NY  
41 14853, USA

42

43 **Corresponding authors:** Yu-Jin Hao (haoyujin@sdau.edu.cn), Da-Gang Hu  
44 (fap\_296566@163.com)

45

46 **Abstract**

47 Excessive application of nitrate, an essential macronutrient and a signal regulating  
48 diverse physiological processes, decreases malate accumulation in apple fruit, but the  
49 underlying mechanism remains poorly understood. Here, we show that an apple  
50 BTB/TAZ protein MdBt2 is involved in regulating malate accumulation and vacuolar  
51 pH in response to nitrate. *In vitro* and *in vivo* assays indicate that MdBt2 interacts  
52 directly with and ubiquitinates a bHLH transcription factor, MdCibHLH1, via the  
53 ubiquitin/26S proteasome pathway in response to nitrate. This ubiquitination results in  
54 the degradation of MdCibHLH1 protein and reduces the transcription of  
55 MdCibHLH1-targeted genes involved in malate accumulation and vacuolar  
56 acidification including *MdVHA-A* encoding a vacuolar H<sup>+</sup>-ATPase gene, and  
57 *MdVHP1* encoding a vacuolar H<sup>+</sup>-pyrophosphatase gene, as well as *MdALMT9*  
58 encoding a aluminum-activated malate transporter gene. A series of transgenic  
59 analyses in apple materials including fruits, plantlets and calli demonstrate that  
60 MdBt2 controls nitrate-mediated malate accumulation and vacuolar pH at least  
61 partially, if not completely, via regulating the MdCibHLH1 protein level. Taken  
62 together, these findings reveal that MdBt2 regulates the stability of MdCibHLH1 via

63 ubiquitination in response to nitrate, which in succession transcriptionally reduces the  
64 expression of malate-associated genes, thereby controlling malate accumulation and  
65 vacuolar acidification in apples under high nitrate supply.

66

## 67 **Introduction**

68 Malate, as a key metabolite, plays a vital role in plant metabolism, pH  
69 homeostasis, nutrient uptake, osmotic adjustment and abiotic stress resistance (Ferne  
70 and Martinoia, 2009; Finkemeier and Sweetlove, 2009; Bai et al., 2015; Hu et al.,  
71 2017). Cellular malate accumulation also largely determines the acidity and  
72 perception of sweetness of fleshy fruits and their processed products (Yao et al., 2007;  
73 Ye et al., 2017; Butelli et al., 2019; Ma et al., 2019). The majority of malate in the  
74 parenchyma cells of fleshy fruits is in the vacuole (Yamaki, 1984). Malate  
75 accumulation is a complex process involving synthesis, degradation and transport of  
76 malate. Although malate metabolism can alter fruit malate level (Sweetman et al.,  
77 2009; Centeno et al., 2011), it appears that transport of malate from the cytosol into  
78 the vacuole is the step that largely controls malate accumulation (Etienne et al., 2013;  
79 Hu et al., 2016a; Ma et al., 2019).

80 Vacuolar proton pumps and malate transporters are crucial for malate transport  
81 into the vacuole. Vacuolar proton pumps, such as V-ATPase and V-PPase, acidify the  
82 vacuoles by pumping protons across the tonoplast. The resulting low pH protonates  
83 any malate that crosses the tonoplast from the cytosol, effectively trapping malate in  
84 the acid form. This “acid trap” mechanism maintains the malate concentration  
85 gradient across the tonoplast for its facilitated diffusion (Martinoia et al., 2007;  
86 Etienne et al., 2013; Eisenach et al., 2014; Hu et al., 2016a). Aluminum-activated  
87 malate transporter/channel (ALMT) as well as tonoplast dicarboxylate transporter  
88 (tDT) enables the transport of malate across the tonoplast (Kovermann et al., 2007;  
89 Ma et al., 2015; Ye et al., 2017). *ALMT9* underlies a major malic acid locus, *Ma* in  
90 apple (Bai et al., 2012; Khan et al., 2013) and a major QTL for malate level in tomato  
91 (Jie et al., 2017).

92 Upstream of these proton pumps and transporters are various transcription  
93 factors (TFs) that regulate their expression. For example, SIWRKY42 directly binds  
94 and affects malate transporter SIALMT9 to negatively regulate malate content in  
95 tomato fruit (Ye et al., 2017). Furthermore, the MYB TFs together with bHLH TFs  
96 and WD40 proteins form MBW complexes to transcriptionally activate the expression

97 of vacuolar proton pumps and malate transporter genes, thereby promoting malate  
98 accumulation in the vacuole (Xie et al., 2012; Hu et al., 2016a, 2017). In apple,  
99 MdMYB73 binds directly to the promoters of *MdVHA-A*, *MdVHP1* and *MdALMT9* to  
100 regulate malate accumulation (Hu et al., 2017). MdCibHLH1, a bHLH transcription  
101 factor homologous to *Arabidopsis* ICE1, interacts with MdMYB73 and enhances its  
102 effects on downstream target genes to regulate malate accumulation in apple (Feng et  
103 al., 2012; Hu et al., 2017).

104 Malate accumulation in fleshy fruits is also affected by environmental factors  
105 and management practices such as nutrient availability, salinity, temperature, and  
106 irrigation (Wu et al., 2002; Burdon et al., 2007; Thakur and Singh, 2012; Etienne et al.,  
107 2013). In response to environmental stresses such as low temperature and salinity,  
108 plants accumulate malate as a metabolite in coping with these stresses, consequently  
109 altering fruit acidity level (Ruffner et al., 1976; Friemert et al., 1988; Hu et al., 2016b).  
110 Nitrate is an essential macronutrient for plant growth and development, and also  
111 serves as a signal regulating many physiological processes (Liu et al., 2017; Maeda et  
112 al., 2018). High nitrate supply has been reported to reduce malate accumulation  
113 (Spironello et al., 2004), but how nitrate affects the malate accumulation remains  
114 poorly understood.

115 The BTB-TAZ proteins respond to diverse environmental stimuli such as  
116 nutrients and stress and internal signals such as hormones in plants (Mandadi et al.,  
117 2009). We recently found that BT2 as a BTB-TAZ protein responds to nitrate in  
118 modulating anthocyanin synthesis and accumulation in apple (Wang et al., 2018). In  
119 this work, we showed that MdBT2 protein regulates malate accumulation in response  
120 to nitrate. A yeast two-hybrid screening library allowed for identification of  
121 MdCibHLH1 as a candidate protein for MdBT2 interaction. Subsequently, we  
122 uncovered that MdBT2 regulates the stability of MdCibHLH1 via ubiquitination in  
123 response to nitrate, which in succession transcriptionally reduces the expression of  
124 several malate-associated genes in altering malate accumulation in apple.

125

126

## 127 **Results**

### 128 **Exogenous application of nitrate reduces malate accumulation**

129 To determine if nitrate has any effect on malate accumulation, we provided apple  
130 calli and plantlets with different nitrate concentrations (0 to 5 mM) and measured  
131 malate contents in various tissues first. High concentrations of nitrate were found to  
132 significantly reduce tissue malate accumulation (Supplemental Fig. S1).

133 To confirm the effect of nitrate on malate accumulation in fruits, we treated  
134 ‘Royal Gala’ apple fruits with exogenous nitrate from 0 to 5 mM for further analysis  
135 (Fig. 1A). Nitrate application led to a significant reduction in fruit malate level (Fig.  
136 1C). The expression levels of malate-related genes, including vacuolar proton pumps  
137 *MdVHA-A*, *MdVHA-Bs* and *MdVHP1*, and the vacuolar malate channel *MdALMT9* as  
138 well as malate-associated MYB TF *MdMYB73*, were significantly decreased when  
139 nitrate concentration increased from 0 to 5 mM (Fig. 1B). Subsequently, we measured  
140 the hydrolytic and proton-pumping activities of V-ATPase and V-PPase activity.  
141 V-ATPase hydrolytic activity and proton-pumping activity and V-PPase activity were  
142 decreased to 1/2, 2/3, and 1/3 of the 0 mM N control, respectively, in the 5 mM N  
143 treatment (Fig. 1, D-F). Furthermore, measurements of vacuolar pH with the  
144 ratiometric fluorescent pH indicator  
145 2',7'-bis-(2-carboxyethyl)-5-(6)-carboxyfluorescein (BCECF) showed that the  
146 average vacuolar pH was increased from 3.6 in 0 mM N to 3.7 and 4.1, respectively,  
147 in the 0.5 mM and 5 mM N treatments (Fig. 1, G-H). These results suggest that high  
148 nitrate level reduces vacuolar acidification by decreasing the proton-pumping  
149 activities of both V-ATPase and V-PPase in apple.

150

### 151 **BTB/TAZ protein MdBT2 controls malate accumulation in response to nitrate**

152 Considering that BT2 as a BTB-TAZ protein responds to nitrate in plants  
153 (Mandadi et al., 2009; Wang et al., 2018), we explored the potential role of BT2 in  
154 nitrate-modulated malate accumulation. We first looked at the expression of *MdBT2*  
155 in response to nitrate and found that nitrate application increased its transcript level  
156 (Supplemental Fig. S2). We then generated 35S::*anti-MdBT2* RNAi transgenic apple  
157 calli (35S::*anti-MdBT2*) (Supplemental Fig. S2), and detected higher malate levels in  
158 the anti-*MdBT2* calli.

159 To confirm the role of MdBT2 in malate accumulation in response to nitrate,  
160 transgenic apple plantlets overexpressing *MdBT2* (MdBT2-OX) were treated with 0

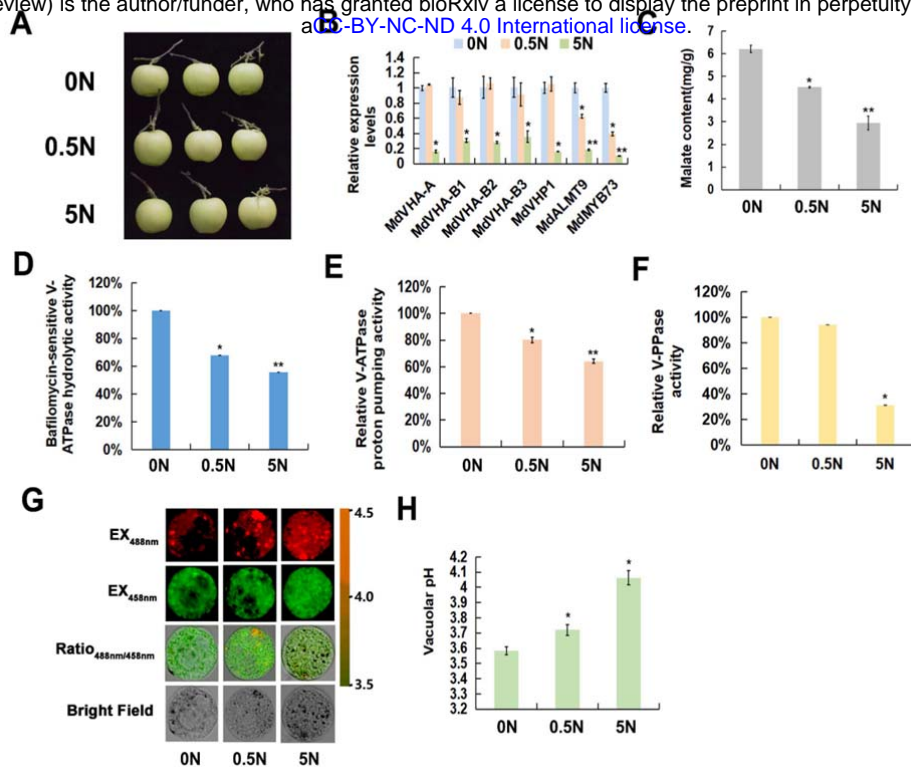

**Figure 1. Exogenous application of nitrate reduces malate accumulation.** **A**, The ‘Royal Gala’ apple fruits were treated with different concentrations of exogenous nitrate (including 0 mM, 0.5 mM and 5 mM nitrate). **B**, The expression of malate-related genes under different concentrations of exogenous nitrate using qPCR. The genes included about vacuolar proton pumps *MdVHA-A*, *MdVHA-Bs* and *MdVHP1*, and the vacuolar malate channel *MdALMT9* as well as malate-associated MYB TF *MdMYB73*. **C**, Malate contents under different concentrations of exogenous nitrate. **D**, Bafilomycin A1-sensitive ATP hydrolytic activity of V-ATPase under different concentrations of exogenous nitrate. **E**, Proton-pumping activity of V-ATPase under different concentrations of exogenous nitrate was measured by tracking the ATP-dependent quenching of acridine orange using a fluorescence spectrometer with excitation at 493 nm and emission at 545 nm. **F**, V-PPase activity under different concentrations of exogenous nitrate. **G**, Emission intensities of protoplast vacuoles under different concentrations of exogenous nitrate loaded with BCECF at 488 nm (first column) and 458 nm (second column). Scale bar = 10  $\mu$ m. **H**, Quantification of the pH in vacuoles under different concentrations of exogenous nitrate. Significant difference was detected by *t*-test. \* $P < 0.05$ , \*\* $P < 0.01$ .

161 mM N (0 N-MdBT2-OX), while *antiMdBT2* transgenic apple plantlets (*antiMdBT2*)  
 162 were treated with 5 mM N (5N-*antiMdBT2*), along with wild-type (WT) control  
 163 under 0 mM or 5 mM nitrate. 5 mM nitrate decreased malate accumulation in WT  
 164 plantlets; MdBT2-OX reduced the malate level at 0 mM nitrate whereas *antiMdBT2*

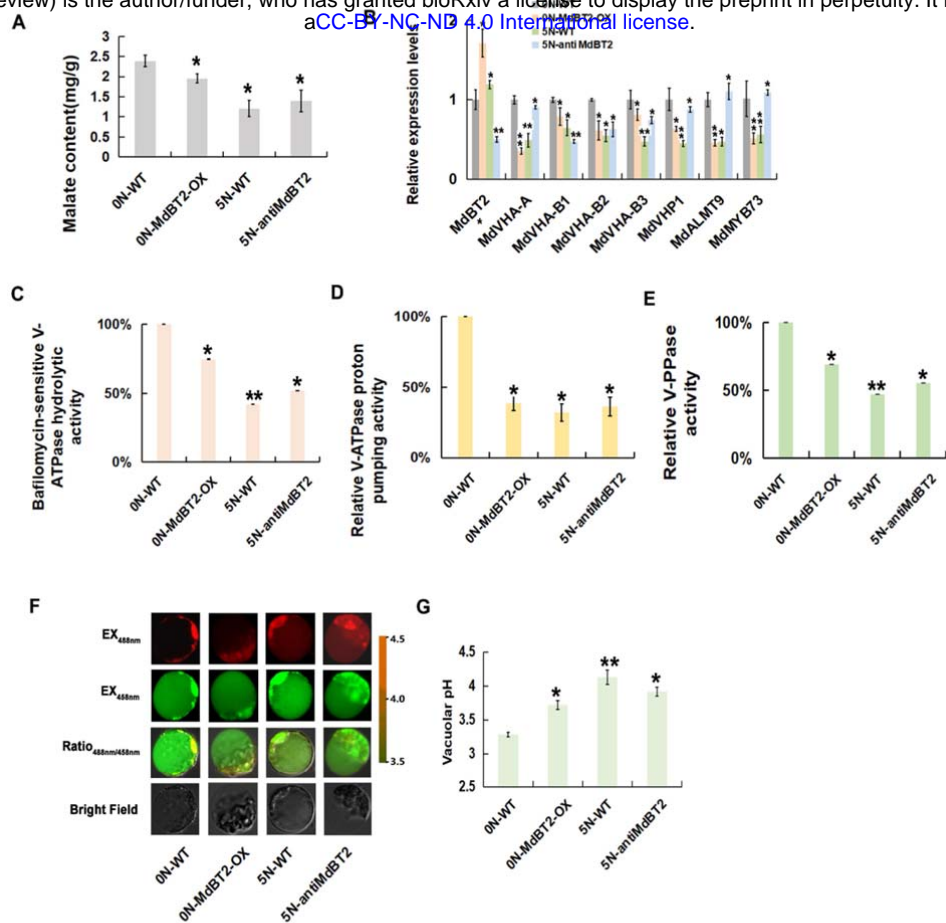

**Figure 2. BTB/TAZ protein MdBT2 controls malate accumulation in response to nitrate.** **A**, Malate contents in WT and transgenic apple plantlets under different concentrations of exogenous nitrate. ‘GL-3’ plantlets were treated with 0 N (0 N-WT). MdBT2 overexpression transgenic apple plantlets were treated with 0 N (0 N-MdBT2-OX). The antiMdBT2 transgenic apple plantlets were treated with 5 N (5 N-antiMdBT2). **B**, Expression of *MdVHA-A*, *MdVHA-Bs*, *MdVHP1* and *MdALMT9* in WT and transgenic apple plantlets under different concentrations of exogenous nitrate using qPCR. **C to E**, The hydrolytic and proton-pumping activities of V-ATPase and V-PPase in WT and transgenic apple plantlets under different concentrations of exogenous nitrate. **F**, Emission intensities of protoplast vacuoles loaded with BCECF at 488 nm and 458nm. Scale bar = 10  $\mu$ m. **G**, Quantification of the pH in vacuoles. Significant difference was detected by *t*-test. \* $P < 0.05$ , \*\* $P < 0.01$ .

165 increased the malate level at 5 mM nitrate (Fig. 2A).

166 Correspondingly, 5 mM nitrate inhibited the expression of malate-associated  
 167 genes including *MdVHA-A*, *MdVHA-Bs*, *MdVHP1* and *MdALMT9*, and V-ATPase  
 168 hydrolytic and proton-pumping activities as well as V-PPase activity (Fig. 2, B-E);  
 169 overexpression of *MdBT2* decreased the expression of these genes and activities of

170 related enzymes and increased vacuolar pH at 0 mM nitrate whereas antisense  
171 repression of *MdBT2* increased the expression of the genes and activities of related  
172 enzymes and decreased vacuolar pH at 5 mM nitrate (Fig. 2, B-G).

173 Taken together, these results demonstrate that BTB/TAZ protein MdBT2  
174 modulates malate accumulation in response to nitrate in apple.

175

### 176 **MdBT2 physically interacts with MdCibHLH1 via the conserved BTB/BACK** 177 **domain**

178 To explore the regulatory mechanism by which MdBT2 is involved in malate  
179 accumulation in apple, possible MdBT2-interacting proteins were screened using  
180 MdBT2 as a bait through a yeast two hybrid (Y2H) cDNA library. MdCibHLH1, a  
181 basic helix-loop-helix (bHLH) TF that was previously identified to be involved in  
182 malate accumulation and cold resistance, was chosen as a candidate. To determine  
183 whether MdBT2 interacts with MdCibHLH1 protein, Y2H assays were performed. As  
184 MdBT2 protein contains three conserved domains, BTB, BACK and ZnF\_TAZ, we  
185 divided the full-length cDNA of *MdBT2* gene into four fragments, i.e.,  
186 MdBT2<sup>BTB/BACK</sup>, and MdBT2<sup>BTB</sup>, as well as MdBT2<sup>BACK</sup> and MdBT2<sup>BACK/ZnF\_TAZ</sup>.  
187 Subsequently, the full length cDNA and four truncated mutants of *MdBT2* gene were  
188 inserted into the pGBT9 vector, independently, as the bait vectors. Meanwhile, the  
189 full-length MdCibHLH1 cDNA was inserted into the pGAD424 as the prey vector.  
190 The different combinations of bait and prey vectors were transformed into yeast for  
191 Y2H assays. The full-length MdBT2 interacted with the full-length MdCibHLH1  
192 protein (Fig. 3A). Moreover, MdCibHLH1 interacted with the truncated mutant  
193 MdBT2<sup>BTB/BACK</sup> but not with others (Fig. 3A). These results suggest that MdBT2 *in*  
194 *vitro* interacts with MdCibHLH1 via the conserved BTB/BACK domain. In addition,  
195 a GST pull-down assay showed that a GST-tagged MdBT2 physically interacted with  
196 a His-tagged MdCibHLH1 *in vitro* (Fig. 3B).

197 To further confirm the interaction between MdBT2 and MdCibHLH1, an *in vivo*  
198 Bimolecular fluorescence complementation (BiFC) assay using tobacco leaf cells was  
199 conducted. MdBT2 and MdCibHLH1 were ligated to the N-terminal and C-terminal  
200 of YFP, respectively, to generate the constructs MdBT2-nYFP and  
201 MdCibHLH1-cYFP. Subsequently, these constructs including empty vectors with  
202 pairwise combinations were transiently transformed into tobacco leaf cells by  
203 *Agrobacterium*-mediated method. A strong YFP signal was observed in the nucleus of



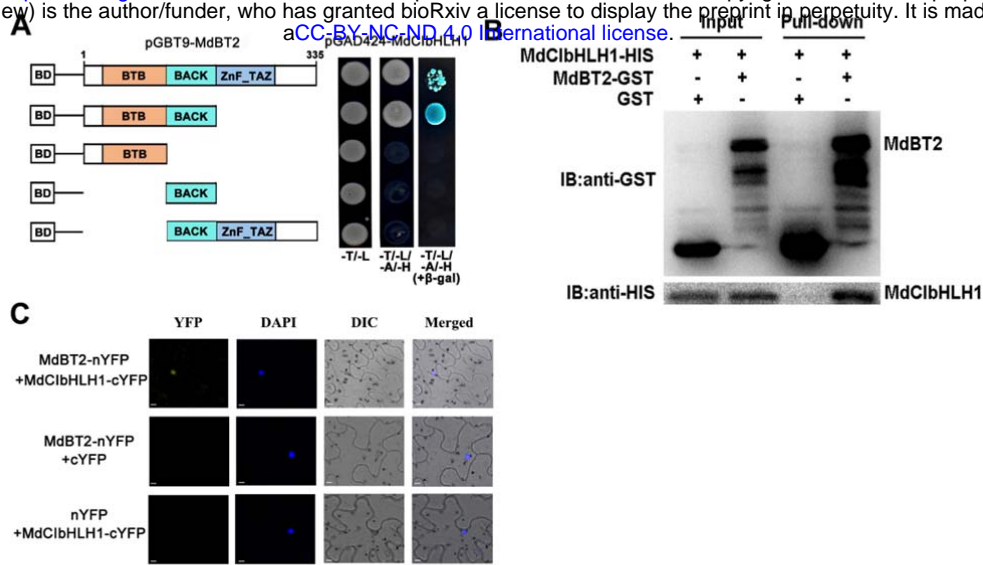

**Figure 3. MdBt2 physically interacts with MdCibHLH1 via the conserved BTB/BACK domain.** **A**, MdBt2 interacted with MdCibHLH1 in a Y2H assay. The full-length and the BTB/BACK domain of MdBt2 interacted with the MdCibHLH1 protein. **B**, Pull-down assays of the interaction between MdBt2 and MdCibHLH1. MdBt2-GST was expressed by *E. coli* resulted in the precipitation of MdCibHLH1-HIS using anti-GST antibody and anti-HIS antibody, respectively. GST alone was used as the control. **C**, BiFC assay showed the interaction between MdBt2 and MdCibHLH1 using tobacco leaf cells. MdBt2-nYFP and MdCibHLH1-cYFP interacted in the nucleus of tobacco leaf cells. Scale bar = 10  $\mu$ m.

204 tobacco leaf cells in the combination of MdBt2-nYFP and MdCibHLH1-cYFP  
 205 constructs, with no signal detected in the other two combinations  
 206 (MdBt2-nYFP+cYFP and nYFP+MdCibHLH1-cYFP) as negative controls (Fig.  
 207 3C). These results indicate that MdBt2 physically interacts with the MdCibHLH1  
 208 protein.

209

### 210 MdCibHLH1 is involved in regulating malate accumulation

211 It is known that MdCibHLH1 interacts with MdMYB73 to modulate malate  
 212 accumulation by directly activating vacuolar transporter genes including *MdALMT9*,  
 213 *MdVHA-A* and *MdVHP1* in apple (Hu et al., 2017). To further verify the functions of  
 214 MdCibHLH1 in the regulation of malate accumulation in apple fruits, the  
 215 *35S::MdCibHLH1* transgenic apple plantlets (MdCibHLH1-OXs) obtained by Feng et  
 216 al. (2012) were grafted onto rootstock M9T337, and transgenic apple fruits were  
 217 harvested at different stages during fruit development in the third growing season.  
 218 Determination of malate contents revealed that fruits of the three *MdCibHLH1*  
 219 transgenic lines (MdCibHLH1-OVXs) had much higher malate levels than the  
 220 wild-type control ('GALA') throughout fruit development, particularly at 40 days after

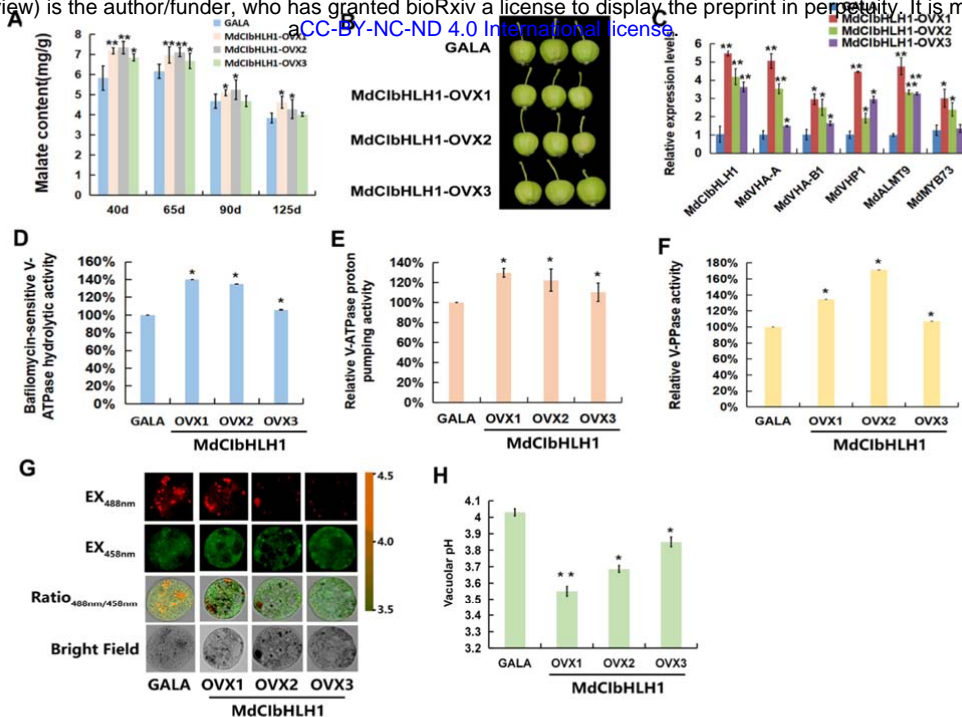

**Figure 4. MDCIBHLH1 is involved in regulating of malate accumulation.** **A**, Malate contents in ‘GALA’ and *MdCibHLH1-OVXs* transgenic apple fruits (*MdCibHLH1-OVXs*) in the whole fruit developmental stages. **B**, The ‘GALA’ and *MdCibHLH1-OVXs* taken in 40 DAF. **C**, The expression of *MdvHA-A*, *MdvHA-B1*, *MdvHP1*, *MdALMT9* and *MdMYB73* in ‘GALA’ and *MdCibHLH1-OVXs*. **D to F**, The hydrolytic and proton-pumping activities of V-ATPase and V-PPase in ‘GALA’ and *MdCibHLH1-OVXs*. **G**, Emission intensities of protoplast vacuoles in ‘GALA’ and *MdCibHLH1-OVXs* with BCECF at 488 nm and 458 nm. Scale bar = 10  $\mu$ m. **H**, Quantification of the pH in vacuoles in ‘GALA’ and *MdCibHLH1-OVXs*. Significant difference was detected by *t*-test. \* $P < 0.05$ , \*\* $P < 0.01$ .

221 flowering (DAF) (Fig. 4A). Subsequently, 40 DAF apple fruits were used for further  
 222 analysis (Fig. 4B).

223 Transcript levels of *MdvHA-A*, *MdvHA-B1* and *MdvHP1*, as well as *MdALMT9*  
 224 and *MdMYB73*, were significantly higher in the three independent  
 225 *MdCibHLH1-OVXs* than in ‘GALA’ fruits control (Fig. 4C). V-ATPase and V-PPase  
 226 activities were 1.2- to 1.8-fold greater in *MdCibHLH1-OVXs* than in ‘GALA’ fruits  
 227 (Fig. 4, D-F). Furthermore, we used BCECF to illustrate the effects of V-ATPase and  
 228 V-PPase activities on vacuolar pH. As shown in Fig. 4, G-H, the average vacuolar pH  
 229 in ‘GALA’ fruits was 4.03 while those of the three *MdCibHLH1-OVXs* were 3.56,  
 230 3.68 and 3.84, respectively. Hence, higher vacuolar  $H^+$  concentrations in  
 231 *MdCibHLH1*-expressing fruits, indicated by the lower pH values, further supports the  
 232 conclusion that *MdCibHLH1* regulates malate accumulation by altering the tonoplast

233 V-ATPase and V-PPase activities.

234

### 235 **MdBT2 affects the stability of MdCibHLH1 protein**

236 Earlier work showed that ubiquitination-related MdBT2 scaffold protein targets  
237 MYB and bHLH TFs for degradation, thereby regulating plant senescence and  
238 anthocyanin biosynthesis (Wang et al., 2018; An et al., 2019). Considering the  
239 interaction between MdBT2 and MdCibHLH1, we predicted that MdBT2 probably  
240 affects the stability of MdCibHLH1 protein. To verify this, cell-free degradation  
241 assays of the prokaryon-expressed and purified MdCibHLH1-HIS fusion proteins  
242 were conducted using protein samples extracted from wild-type (WT), 35S::MdBT2  
243 transgenic apple calli (35S::MdBT2) and 35S::anti-MdBT2. The MdCibHLH1-HIS  
244 protein was more rapidly degraded in the protein extract of the 35S::MdBT2 than in  
245 that of the WT (Figure 5A), whereas the protein was more stable in the protein extract  
246 of 35S::anti-MdBT2 compared to the WT (Fig. 5A). These results suggest that  
247 MdBT2 promotes the degradation of the MdCibHLH1 protein.

248 To further examine whether MdBT2 influences the degradation of the  
249 MdCibHLH1 protein *in vivo*, three types of transgenic calli, 35S::MdCibHLH1-GFP,  
250 35S::MdBT2-MYC + 35S::MdCibHLH1-GFP, and 35S::anti-MdBT2 +  
251 35S::MdCibHLH1-GFP were obtained and used for immunoblotting assays with an  
252 anti-GFP antibody. The abundance of MdCibHLH1 was lower in 35S::MdBT2-MYC  
253 + 35S::MdCibHLH1-GFP, but higher in 35S::anti-MdBT2 + 35S::MdCibHLH1-GFP  
254 than in the WT (Fig. 5B). Meanwhile, cell-free degradation assays were also  
255 performed using 35S::MdCibHLH1-GFP and 35S::MdBT2-MYC +  
256 35S::MdCibHLH1-GFP. As shown in Fig. 5C, the MdCibHLH1-GFP protein in  
257 35S::MdBT2-MYC + 35S::MdCibHLH1-GFP was degraded much greatly than in  
258 35S::MdCibHLH1-GFP, just as they did *in vitro*.

259

### 260 **MdBT2 is involved in the ubiquitination and degradation of MdCibHLH1** 261 **proteins**

262 To examine whether MdCibHLH1 is degraded through a 26S proteasomal  
263 pathway, 35S::MdCibHLH1-GFP treated with the translational inhibitor  
264 cycloheximide (CHX) and the proteasomal inhibitor MG132 were used for  
265 immunoblotting assays with an anti-GFP antibody. The results show that  
266 MdCibHLH1 protein accumulation was almost completely inhibited by CHX in the

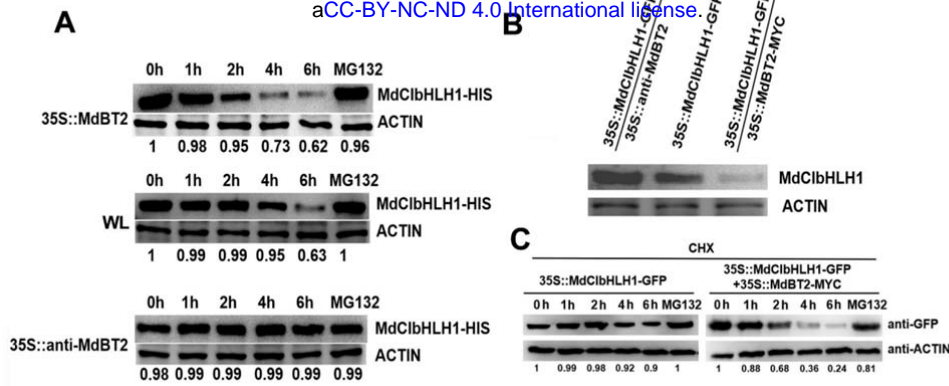

**Figure 5. Mdbt2 affects the stability of MdCibHLH1 protein.** **A**, The cell-free degradation assays of the prokaryon-expressed and purified MdCibHLH1-HIS fusion proteins were using protein samples extracted from WL, 35S::Mdbt2 and 35S::anti-Mdbt2. **B**, Three types of transgenic calli, that is, 35S::MdCibHLH1-GFP, 35S::Mdbt2-MYC + 35S::MdCibHLH1-GFP and 35S::anti-Mdbt2 + 35S::MdCibHLH1-GFP were obtained and used for immunoblotting assays with an anti-GFP antibody. **C**, The cell-free degradation assays were also performed using 35S::MdCibHLH1-GFP and 35S::Mdbt2-MYC + 35S::MdCibHLH1-GFP. Total proteins were analyzed by immunoblotting using the anti-GFP antibody. ACTIN was used as the loading control.

267 35S::MdCibHLH1-GFP (Fig. 6A). By contrast, MdCibHLH1 protein highly  
 268 accumulated in the transgenic calli treated with MG132 (Fig. 6A), suggesting that the  
 269 MdCibHLH1 protein is degraded in a 26S proteasome-dependent manner.

270 26S proteasome-mediated protein degradation is generally associated with  
 271 ubiquitination modifications. To examine if Mdbt2 participates in the ubiquitination  
 272 of the MdCibHLH1 protein, the Mdbt2-MYC active protein extracted from  
 273 35S::Mdbt2-MYC were co-incubated with prokaryon-expressed and purified  
 274 MdCibHLH1-HIS protein, E1, E2 and ubi *in vitro* for immunoprecipitation using  
 275 anti-HIS and anti-ubi antibodies. A higher amount of high-molecular mass forms of  
 276 MdCibHLH1, that is, polyubiquitinated MdCibHLH1 (Ubi(n)-MdCibHLH1-HIS),  
 277 was detected when supplemented with Mdbt2-MYC active protein (Fig. 6, B and C).  
 278 Therefore, it seems that Mdbt2 is essential for the ubiquitination of MdCibHLH1  
 279 proteins.

280 Subsequently, *in vivo* ubiquitination assays were conducted using  
 281 35S::MdCibHLH1-GFP, 35S::MdCibHLH1-GFP + 35S::Mdbt2-MYC and  
 282 35S::MdCibHLH1-GFP + 35S::anti-Mdbt2 (Fig. 6, D and E). The anti-GFP antibody  
 283 and anti-ubi antibodies were used to detect the MdCibHLH1-GFP protein  
 284 accumulation. The abundance of polyubiquitinated MdCibHLH1-GFP was greater in  
 285 35S::MdCibHLH1-GFP + 35S::Mdbt2-MYC than in 35S::MdCibHLH1-GFP, but

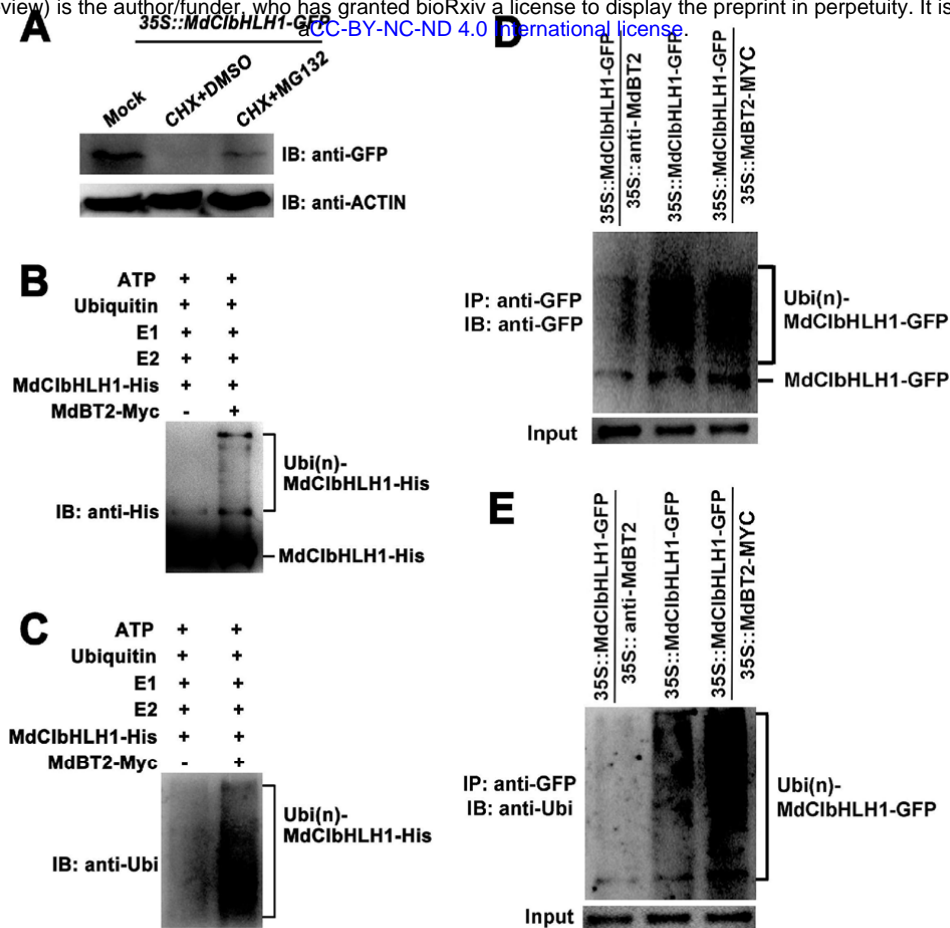

**Figure 6. Mdbt2 is involved in the ubiquitination and degradation of MdCibHLH1 proteins.** A, 35S::MdCibHLH1-GFP were treated with CHX and MG132 for 6h and then measured the MdCibHLH1-GFP protein level using anti-GFP antibody. B to E, Mdbt2 promoted the ubiquitination of MdCibHLH1 protein *in vitro* and *in vivo*. B and C, The Mdbt2-MYC active protein extracted from 35S::Mdbt2-MYC were co-incubated with prokaryon-expressed and purified MdCibHLH1-HIS protein, E1, E2 and ubi *in vitro* for immunoprecipitation using anti-HIS and anti-ubi antibodies. D and E, Ubiquitination assays *in vivo* were measured using 35S::MdCibHLH1-GFP, 35S::MdCibHLH1-GFP + 35S::Mdbt2-MYC and 35S::MdCibHLH1-GFP + 35S::anti-Mdbt2. The anti-GFP antibody and anti-ubi antibodies were used to detect the MdCibHLH1-GFP proteins accumulation. IP, Immunoprecipitated. IB, immunoblotted.

286 lower in 35S::MdCibHLH1-GFP + 35S::anti-Mdbt2 than in 35S::MdCibHLH1-GFP  
287 (Fig. 6, D and E). These results suggest that the ubiquitination and degradation of the  
288 MdCibHLH1 protein was mediated by Mdbt2.

289

290 **Nitrate participates in the regulation of Mdbt2-mediated MdCibHLH1 protein**  
291 **stability**

292 To determine whether nitrate is involved in the regulation of MdBt2-mediated  
293 MdCibHLH1 protein stability, the 35S::MdCibHLH1-GFP calli were provided with  
294 nitrate (+N) or without nitrate (-N). The total proteins extracted from these calli  
295 samples were then used for immunoblotting assays with anti-GFP antibody.  
296 Degradation of the MdCibHLH1 protein was accelerated in the presence of nitrate  
297 (Fig. 7A). In contrast, the MdCibHLH1 proteins gradually accumulated in the absence  
298 of nitrate (Figure 7A). These results suggest that nitrate facilitates the degradation of  
299 MdCibHLH1.

300 To examine the effect of nitrate on MdCibHLH1 protein ubiquitination,  
301 immunoblotting assays were conducted using 35S::MdCibHLH1-GFP treated with or  
302 without nitrate. Exogenous nitrate treatment accelerated the ubiquitination of  
303 MdCibHLH1 in 35S::MdCibHLH1-GFP, while the MdCibHLH1 protein  
304 ubiquitination was alleviated in the 35S::MdCibHLH1-GFP + 35S::anti-MdBt2 (Fig.  
305 7B). These results suggest that nitrate is involved in the regulation of  
306 MdBt2-mediated MdCibHLH1 protein ubiquitination.

307 In addition, the level of the ubiquitinated MdCibHLH1 protein was also assessed  
308 using an anti-ubi antibody that recognizes only ubiquitinated MdCibHLH1 protein.  
309 Similarly, the ubiquitin signal was significantly enhanced in the  
310 35S::MdCibHLH1-GFP treated with nitrate compared with absence of nitrate,  
311 whereas the ubiquitin signal was reduced in the 35S::MdCibHLH1-GFP +  
312 35S::anti-MdBt2 (Fig. 7C)

313 Overall, these results suggest that nitrate acting as a signal regulates  
314 MdBt2-mediated MdCibHLH1 protein stability.

315

### 316 **MdBt2 modulates malate accumulation in an MdCibHLH1-dependent manner**

317 To investigate whether MdBt2 and MdCibHLH1 regulate malate accumulation  
318 in apple, a viral vector-based method was applied to alter their expression using  
319 vector TRV for suppression. Two viral constructs, including MdBt2-TRV and  
320 MdCibHLH1-TRV, were obtained. These constructs including MdBt2-TRV and  
321 MdCibHLH1-TRV, as well as two combinations MdBt2-TRV + MdCibHLH1-TRV  
322 were used for fruit infiltration, with the empty vectors as controls (Fig. 8A). qPCR  
323 assays showed that the transcript levels of *MdBt2* and *MdCibHLH1* genes were  
324 significantly decreased after being infiltrated with MdBt2-TRV and  
325 MdCibHLH1-TRV (Fig. 8B).

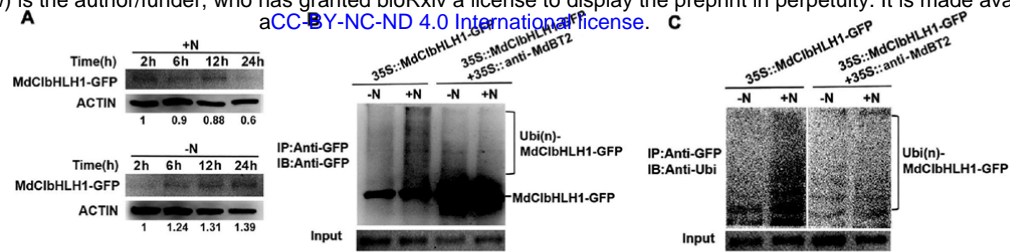

**Figure 7. Nitrate participates in the regulation of MdBt2-mediated MdCibHLH1 protein stability.**

**A**, The protein stability of MdCibHLH1 in response to nitrate. 35S::MdCibHLH1-GFP were incubated without nitrate (-N) and with nitrate (+N) respectively. The total proteins extracted from these calli samples were then used for immunoblotting assays with anti-GFP antibody.

**B and C**, The immunoblotting assays were conducted using 35S::MdCibHLH1-GFP treated with or without nitrate.

326 In response to suppression of *MdCibHLH1*, transcript levels of the  
 327 MdCibHLH1-targeted genes involved in malate accumulation including *MdVHA-A*,  
 328 *MdVHP1* and *MdALMT9*, were decreased. By contrast, the transcripts of these genes  
 329 were increased in the MdBt2-TRV injected apple fruits (Fig. 8B). Subsequently,  
 330 malate levels, hydrolytic and proton-pumping activities of V-ATPase and V-PPase  
 331 activity were measured in apple fruit tissues around the infiltration sites.  
 332 MdCibHLH1-TRV injected apple fruits had lower malate levels and lower  
 333 proton-pumping activities than the TRV control, whereas MdBt2-TRV injected apple  
 334 fruits produced higher malate levels and proton-pumping activities than the control  
 335 (Fig. 8, C-F). In the MdBt2-TRV + MdCibHLH1-TRV double-injected apple fruits,  
 336 *MdCibHLH1* suppression abolished the effect of MdBt2-TRV infiltration on malate  
 337 accumulation and proton-pumping activities, indicating that MdBt2 controls malate  
 338 accumulation at least partially, if not entirely, via MdCibHLH1 in apple. Similar  
 339 results were obtained in *MdBt2* and *MdCibHLH1* transgenic apple plantlets  
 340 (Supplemental Fig. S3).

341 In earlier work, we showed that MdCibHLH1 interacts with and activates  
 342 MdMYB73 to modulate malate accumulation and vacuolar acidification by directly  
 343 activating *MdALMT9* in apples (Hu et al., 2017). Because MdBt2 mediates the  
 344 ubiquitination and degradation of the MdCibHLH1 protein, it is reasonable to predict  
 345 that MdBt2 influences the transcription level of MdMYB73-downstream gene  
 346 *MdALMT9*. To verify this hypothesis, GUS assays were conducted to determine the  
 347 effect of MdBt2 on the transcriptional activity of *MdALMT9*. (Supplemental Fig. S4).  
 348 MdBt2-MdCibHLH1 regulatory module negatively regulates GUS transcription of  
 349 MdMYB73-downstream gene *MdALMT9*, which is driven by the *MdALMT9*

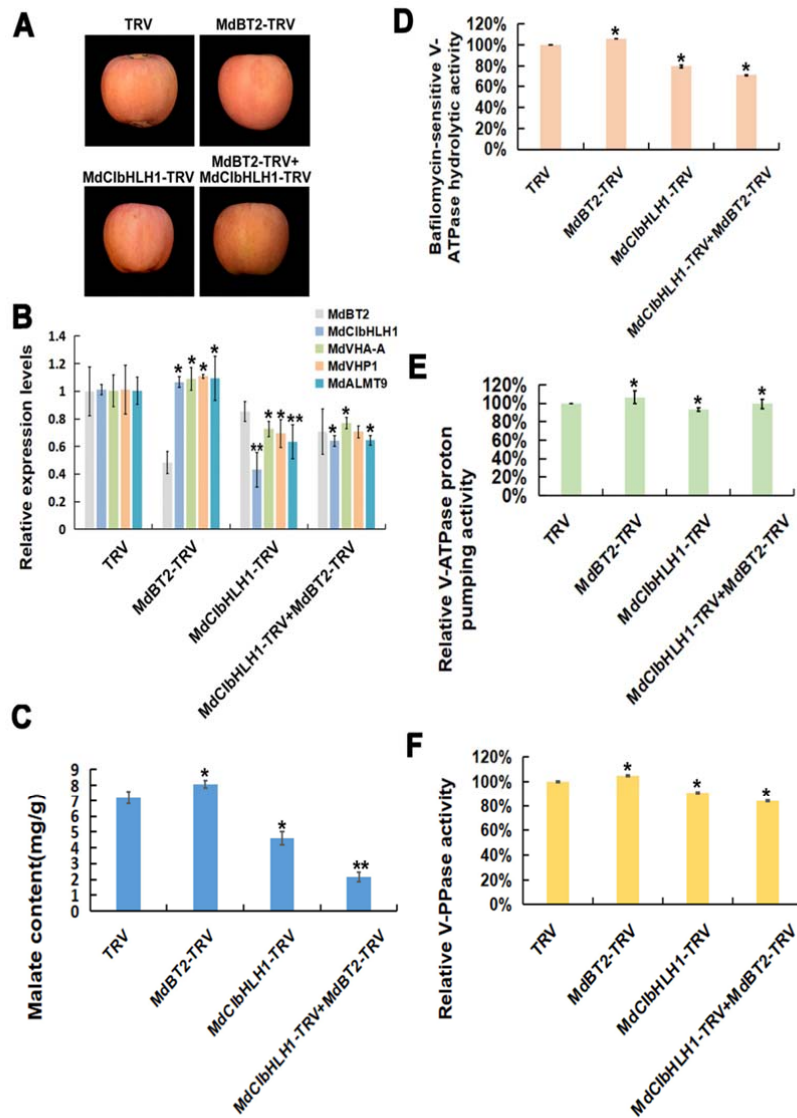

**Figure 8. MdBT2 modulates malate accumulation in an MdCibHLH1-dependent manner.** **A**, Viral vector-based method was applied to apple injection assays. TRV, TRV1 + TRV2; MdBT2-TRV, TRV1 + MdBT2-TRV2; MdCibHLH1-TRV, TRV1 + MdCibHLH1-TRV2; MdBT2-TRV2 + MdCibHLH1-TRV2, TRV1 + MdBT2-TRV2 + MdCibHLH1-TRV2. **B**, The qPCR analysis of the expression of *MdVHA-A*, *MdVHP1* and *MdALMT9*. **C to F**, The malate contents, hydrolytic and proton-pumping activities of V-ATPase and V-PPase were measured in apple fruit tissues around the sites infiltrated with the different viral constructs. Significant difference was detected by *t*-test. \**P* < 0.05, \*\**P* < 0.01.

350 promoter.

351 Taken together, these results further demonstrate that MdBT2 modulates malate  
352 accumulation in an MdCibHLH1-dependent manner.



353

354

## 355 Discussion

356 Malate is a crucial metabolite regulated by various signaling pathways that  
357 integrate responses of gene expression to environmental factors such as nutrient  
358 availability. Physiological studies have demonstrated that malate and nitrate have  
359 intricate regulation mechanisms during plant growth and development (Stitt, 1999;  
360 Etienne et al., 2013). Although a connection between nitrate and malate has long been  
361 speculated, the exact molecular mechanism has remained unclear. Some reports  
362 suggest that nitrogen positively regulates fruit acidity (Reitz and Koo, 1960; Ruhl,  
363 1989; Jia et al., 1999; Radi et al., 2003), while others have shown a negative  
364 relationship between nitrate level and fruit acidity (Spironello et al., 2004; Wang et al.,  
365 2010). The present study reveals that high nitrate inhibits malate accumulation in  
366 apple (Fig. 1; Supplemental Fig. S1). MdBt2, a nitrate-responsive protein, which was  
367 shown to be involved in regulating anthocyanin accumulation through interacting with  
368 the MdMYB1 in our earlier work (Wang et al., 2018), plays a key role in modulating  
369 malate accumulation in response to nitrate. MdBt2 interacts with and ubiquitinates  
370 MdCibHLH1 in response to nitrate (Fig. 2-8), providing the molecular link between  
371 nitrate availability and malate accumulation.

372 BT2 is a scaffold protein that recruits CUL3 protein to form the E3 ligase  
373 complex or bridges an unknown ubiquitin E3 ligase to ubiquitinate and degrade the  
374 target proteins (Robert et al., 2009; Zhao et al., 2016; Wang et al., 2018). MdCUL3  
375 protein is required for the MdBt2-mediated ubiquitination and degradation of  
376 MdbHLH104 for iron homeostasis in apple, with the TAZ domain of MdBt2 being  
377 essential for the interaction (Zhao et al., 2016). However, MdBt2 promotes the  
378 ubiquitination and degradation of MdMYB1 in regulating anthocyanin biosynthesis  
379 through an MdCUL3-independent pathway, while the BACK domain of MdBt2 is  
380 indispensable for the interaction (Wang et al., 2018). In this study, both BTB domain  
381 and BACK domain are required for the interaction between MdBt2 and MdCibHLH1  
382 (Fig. 3). Based on these findings, we speculate that MdBt2 possibly ubiquitinates  
383 MdCibHLH1 through an MdCUL3-independent pathway.

384 In apple, MdCibHLH1, an ICE1-like protein, regulates cold tolerance in a  
385 CBF-dependent way (Feng et al., 2012). The ICE1-CBF-COR cold response pathway  
386 is one of the dominating cold signaling modules that bring about the cold tolerance  
387 response in *Arabidopsis* (Chinnusamy et al., 2003; Shi et al., 2018). It has been  
388 known that malate accumulation is affected by temperature. High temperature reduces

389 malate accumulation in fruit (Buttrose et al., 1971; Lobit et al., 2006; Etienne et al.,  
390 2013) whereas low temperature facilitates vacuolar malate accumulation probably by  
391 affecting the proton pumps transport activity and membrane fluidity (Murata and Los,  
392 1997; Terrier et al., 2001; Etienne et al., 2013). As malate serves as an osmoticum for  
393 plant resistance to low temperature (Ruffner et al., 1976; Friemert et al., 1988;  
394 Kovermann et al., 2007) and salinity (Hu et al., 2016b), our previous work (Hu et al.,  
395 2017) and current work strongly suggest that MdCibHLH1 regulates plant cold  
396 tolerance via more than one pathway. In addition to the CBF-dependent pathway,  
397 MdCibHLH1 controls cold tolerance via regulating malate accumulation by the  
398 MdCibHLH1-MdMYB73 pathway, which was previously described in our study (Hu  
399 et al., 2017).

400 Malate accumulation involves transcriptional regulation of vacuolar proton  
401 pumps and malate transporters (Xie et al., 2012; Li et al., 2017; Hu et al., 2017). It has  
402 been reported that MdbHLH3 plays a central role in the accumulation of both malate  
403 and anthocyanins by interacting with MdMYB1 and binding to the promoter of  
404 MdMYB1 (Xie et al., 2012; Hu et al., 2016a). MdCibHLH1 interacts with  
405 MdMYB73 and enhances its transcriptional activity on the downstream target genes  
406 in regulating malate accumulation (Fig. 4 and 8; Supplemental Fig. S4; Hu et al.,  
407 2017). In both cases, we speculate that the MBW complex is recruited to regulate  
408 malate accumulation. However, the target proteins of MdbHLH3 and MdCibHLH1  
409 differ in their functions in regulating malate vs. anthocyanin accumulation. Recent  
410 studies have identified *Noemi*, encoding a bHLH transcription factor, controls two  
411 co-evolved traits in citrus, fruit acidity and anthocyanin levels (Butelli et al., 2019;  
412 Zhu et al., 2019). Our findings here suggest that *Noemi* might regulate fruit acidity  
413 and anthocyanin levels via a pathway similar to MdbHLH3-MdMYB1 (Xie et al.,  
414 2012; Hu et al., 2016a).

415 Based on the findings presented in this work and elsewhere (Hu et al., 2017), we  
416 propose a working model for the regulation of malate accumulation by nitrate (Fig. 9).  
417 In this model, when not ubiquitinated under nitrate deficiency, MdCibHLH1 enhances  
418 the activity of MdMYB73, which maintains the transcription of malate-associated  
419 genes at a high level, resulting in high malate accumulation. However, MdBT2  
420 ubiquitinates and degrades MdCibHLH1 in response to high nitrate, which reduces  
421 the transcription of malate-associated genes by decreasing the activity of MYB73,  
422 leading to lower malate accumulation. Our findings provide new insights into the

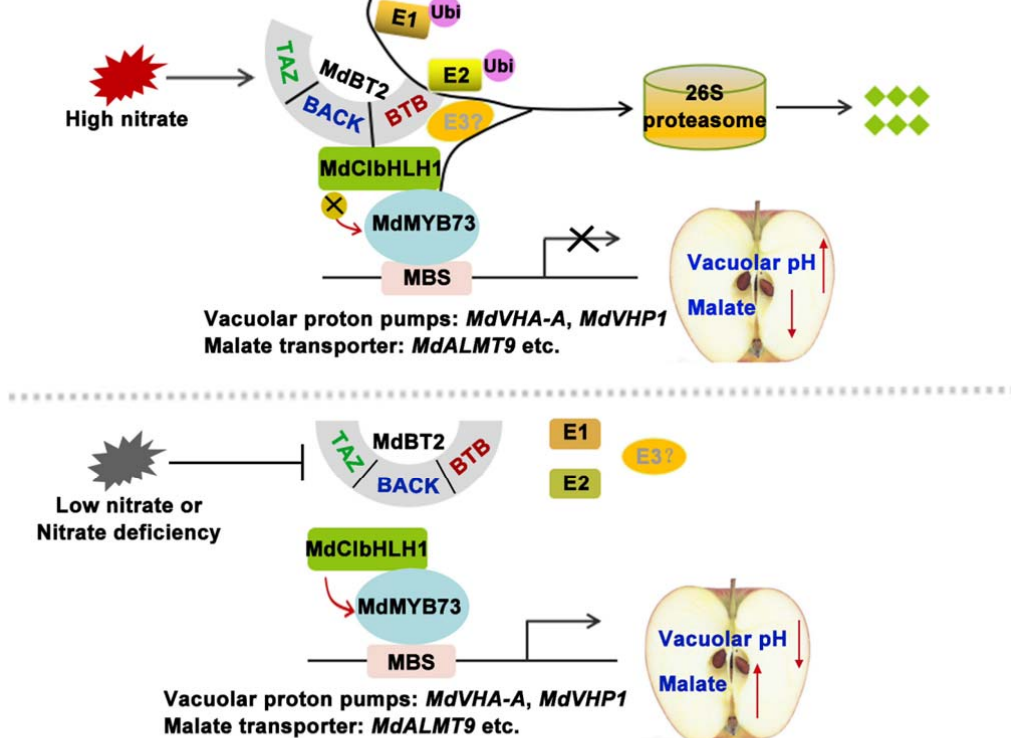

**Figure 9. Work model demonstrating that BTB-TAZ protein MdBT2 ubiquitinates and degrades MdCibHLH1 in response to high nitrate, whereas MdBT2 cannot ubiquitinate MdCibHLH1 in low nitrate to regulate target gene activity of *MdMYB73* to modulate malate accumulation for fruit quality.**

423 molecular mechanism by which nitrate affects malate accumulation and fruit quality,  
 424 providing the link between two key metabolites in plant metabolism. These findings  
 425 not only help us understand the complex regulatory network of malate accumulation  
 426 but also are of great significance in guiding molecular breeding programs as well as  
 427 traditional apple breeding programs for fruit quality improvement.

428

## 429 **Materials and methods**

### 430 **Plant materials and treatments**

431 ‘*GL-3*’ apple (*Malus × domestica*) plantlets, ‘*Royal Gala*’ apple fruits and ‘*Orin*’  
 432 calli were used. The ‘*GL3*’ and transgenic apple plantlets were grown on  
 433 Murashige-Skoog (MS) medium containing 0.2 mg L<sup>-1</sup> NAA, 0.2 mg L<sup>-1</sup> GA and 0.6  
 434 mg L<sup>-1</sup> 6-BA at 25°C under long-day conditions (16 h light / 8 h dark) . ‘*Orin*’ apple  
 435 calli were grown on MS medium with 1.5 mg L<sup>-1</sup> 2,4-D, and 0.4 mg L<sup>-1</sup> 6-BA at 25°C  
 436 in the dark. For phenotypic analyses of the nitrate-deficiency response, the ‘*GL-3*’  
 437 cultures and ‘*Orin*’ apple calli were transferred from nitrate-sufficient medium (MS  
 438 medium with the indicated amount of KNO<sub>3</sub>, 5 mM) to nitrate-deficient medium (MS

439 medium without nitrogen, followed by the indicated amount of KCl, 5 mM, as  
440 control), and then grown for 3 days.

441

#### 442 **Measurement of malate contents**

443 Samples were extracted with 95% (v/v) ice-cold methanol first and then 80%  
444 (v/v) ice-cold methanol after being frozen and ground in liquid nitrogen. The extracts  
445 were evaporated to dryness, dissolved in deionized water, and then centrifuged at  
446 4000g. The supernatants were filtered through a 0.45  $\mu\text{m}$  membrane filter and then  
447 analyzed with high performance liquid chromatography (HPLC) as described by Hu  
448 et al. (2016a).

449

#### 450 **Activity assays of V-ATPase and V-PPase**

451 Isolation of tonoplast membranes was performed as described by Terrier et al.  
452 (2001). The bafilomycin  $A_1$ -sensitive ATP hydrolytic activity and V-ATPase  $H^+$   
453 transport activity as well as V-PPase activity were measured as described by Hu et al.  
454 (2016a, 2017).

455

#### 456 **Measurement of vacuolar pH**

457 Isolation of protoplasts from apple fruit, plantlets and calli as well as vacuolar  
458 pH imaging were conducted as previously described by Hu et al. (2016a, 2017). A  
459 pH-sensitive fluorescent dye BCECF-AM was used to measure vacuolar pH. The  
460 vacuolar pH was quantified by the ratio of 488 nm and 458 nm excitation wavelengths.  
461 The ion concentration tool of Zeiss LSM confocal software was used to generate the  
462 ratio images.

463

#### 464 **Quantitative RT-PCR (qPCR) assays**

465 Total RNA was extracted from apple flesh, plantlets and calli using RNA Plant  
466 Plus Reagent (Tiangen, Beijing, China) and qPCR analysis was performed as  
467 described previously (Hu et al., 2019). The primers used for qPCR assays are listed in  
468 Supporting Information Table S1. The sequences used in this study were obtained  
469 from the GDR databases (<https://www.rosaceae.org/>). The GenBank accession  
470 numbers are: *MdCibHLH1* (MDP0000662999), *MdBT2* (MDP0000151000),  
471 *MdMYB73* (MDP0000894463), *MdVHA-A* (MDP0000844729), *MdVHP1*  
472 (MDP0000688191), *MdALMT9* (MDP0000290997).

473

#### 474 **Yeast two-hybrid (Y2H) assay**

475 Y2H assays were performed as described by Wang et al. (2018). The full-length  
476 cDNA of MdCibHLH1 was amplified and inserted into pGAD424, while MdBT2  
477 cDNAs and truncated sequences (amino acids 1-335, 1-195, 1-128, 129-195, 129-335)  
478 were amplified and inserted into pGBT9. The plasmids of pGAD424-MdCibHLH1  
479 and the pGBT9-MdBT2s were co-transformed into Y2H Gold (Clontech, Mountain  
480 View, CA, USA). The yeasts were grown on -L/-T selection medium for the  
481 transformation control and on -L/-T/-H/-A selection medium with or without X-gal  
482 for the interaction analysis.

483

#### 484 **Pull-down assays**

485 The full-length cDNA of MdCibHLH1 was amplified by PCR and inserted into  
486 pET-32a to generate HIS-tagged recombinant protein (MdCibHLH1-HIS). The  
487 full-length cDNA of MdBT2 was also amplified by RT-PCR and cloned into  
488 pGEX-4T to produce GST-tagged fusion protein (MdBT2-GST). The fusion proteins  
489 of MdCibHLH1-HIS, MdBT2-GST and empty GST were used for the pull-down  
490 assays according to Hu *et al.* (2019).

491

#### 492 **Bimolecular fluorescence complementation (BiFC) assays**

493 The full-length cDNA of MdBT2 was inserted into the vector  
494 35S::pSPYNE-nYFP (MdBT2-nYFP) and MdCibHLH1 was inserted into the vector  
495 35S::pSPYCE-cYFP (MdCibHLH1-cYFP). Solutions of *Agrobacterium* harboring  
496 recombinant plasmids (MdBT2-nYFP + MdCibHLH1-cYFP) were injected into  
497 tobacco leaves. The empty vectors (MdBT2-nYFP + cYFP and nYFP +  
498 MdCibHLH1-cYFP) were used as negative controls.

499

#### 500 **Protein degradation and ubiquitination assays**

501 For the degradation assays of the MdCibHLH1 protein *in vitro*, apple calli  
502 (35S::MdBT2, WL and 35S::anti-MdBT2) and the MdCibHLH1-HIS fusion protein  
503 were prepared. The extraction buffer contained 25 mM Tris (pH 7.5), 5 mM DTT, 10  
504 mM NaCl, 10 mM MgCl<sub>2</sub>, 4 mM PMSF and 10 mM ATP. The MdCibHLH1-HIS  
505 fusion protein and apple calli were extracted and incubated at 22°C. Samples were  
506 collected at the indicated time (0 h, 1 h, 2 h, 4 h and 6 h) and examined using an  
507 anti-HIS antibody. For the proteasome inhibitor experiments, 50 μM MG132 was

508 added. For the degradation assays of the MdCibHLH1 protein *in vivo*, two types of  
509 apple calli (35S::MdCibHLH1-GFP and 35S::MdCibHLH1-GFP +  
510 35S::MdbT2-MYC) were prepared. Total proteins were monitored at the indicated  
511 times (0 h, 1 h, 2 h, 4 h and 6 h) when 250 mM CHX was added, and then the  
512 anti-GFP antibody was used for immunoblotting assays.

513 For the ubiquitination assays *in vivo*, three types of apple calli  
514 (35S::MdCibHLH1-GFP, 35S::MdCibHLH1-GFP + 35S::MdbT2-MYC and  
515 35S::MdCibHLH1-GFP + 35S::anti-MdbT2) were prepared and treated with 50  $\mu$ M  
516 MG132 for 10 h before extraction. The protein extracts were immunoprecipitated  
517 using a Pierce Classic Protein A IP Kit (ThermoFisher Scientific, Waltham, MA, USA)  
518 with anti-GFP and anti-ubi antibodies. For the ubiquitination assays *in vitro*,  
519 35S::MdbT2-MYC apple calli were treated with 50  $\mu$ M MG132 for 10 h to obtain the  
520 MdbT2-MYC active protein using Pierce Classic Protein A IP Kit. The incubation  
521 buffer contained 50 mM Tris (pH 7.5), 2 mM DTT, 50 mM MgCl<sub>2</sub>, 2 mM ATP, 100 ng  
522 rabbit E1, 100 ng human E2 and 1  $\mu$ g ubi. The buffer and MdCibHLH1-HIS protein  
523 with or without MdbT2-MYC active protein *in vivo* were co-incubated at 30°C for 24  
524 h. Protein ubiquitination was detected using anti-HIS and anti-ubi antibodies.

525

### 526 **Apple injection assays**

527 Fruit injection assays were carried out as described previously (Hu et al., 2016).  
528 The CDSs of MdbT2 and MdCibHLH1 were amplified and inserted into viral vector  
529 to obtain MdbT2-TRV (TRV1 + MdbT2-TRV2), MdCibHLH1-TRV (TRV1 +  
530 MdCibHLH1-TRV2) and MdbT2-TRV + MdCibHLH1-TRV (TRV1 + MdbT2-TRV2  
531 + MdCibHLH1-TRV2), with the TRV vector (TRV1 + TRV2) used as control. The  
532 mixture of vectors and the *A. tumefaciens* solutions were injected into apple fruit peel  
533 and flesh and tissues around the injection hole.

534

### 535 **Statistical analysis**

536 All experiments were performed in triplicate. Error bars show the standard  
537 deviation of three biological replicates. Significant difference was detected by *t*-test  
538 using GRAPH PAD PRISM 6.02 software (\*,  $P < 0.05$ ; \*\*,  $P < 0.01$ ).

539

### 540 **Supplemental Data**

541 **Supplemental Fig. S1.** Malate contents under a series of nitrate concentrations in

542 apple.

543 **Supplemental Fig. S2.** BTB/TAZ protein MdBT2 controls malate accumulation in  
544 response to nitrate.

545 **Supplemental Fig. S3.** MdBT2 modulates malate accumulation in an  
546 MdCibHLH1-dependent manner in response to nitrate.

547 **Supplemental Fig. S4.** The MdBT2-MdCibHLH1 regulatory module negatively  
548 regulates MdMYB73-downstream gene *MdALMT9*.

549 **Supplemental Table S1.** The primers used in this study.

550

### 551 **Acknowledgements**

552 We would like to thank Prof. Takaya Moriguchi of National Institute of Fruit Tree  
553 Science, Japan, for ‘*Orin*’ apple calli. This work was supported by grants from the  
554 National Key Research and Development Program of China (2018YFD1000200), the  
555 National Natural Science Foundation of China (31972375, 31772288), the Ministry of  
556 Agriculture of China (CARS-28), Shandong Province (SDAIT-06-03), and Nanjing  
557 Agricultural University (ZW201805).

558

### 559 **Author Contributions**

560 Y.-J.H. and D.-G.H. planned and designed the research. Q.-Y.Z., K.-D.G., J.-H.W.,  
561 J.-Q.Y., X.-F.W. and C.-X.Y. performed experiments, conducted fieldwork, analysed  
562 data etc. Q.-Y.Z., D.-G.H., Y.-J.H. and L.C wrote the manuscript.

563

### 564 **Figure legends**

#### 565 **Figure 1. Exogenous application of nitrate reduces malate accumulation.**

566 **A,** The ‘*Royal Gala*’ apple fruits were treated with different concentrations of  
567 exogenous nitrate (including 0 mM, 0.5 mM and 5 mM nitrate).

568 **B,** The expression of malate-related genes under different concentrations of  
569 exogenous nitrate using qPCR. The genes included about vacuolar proton pumps  
570 *MdVHA-A*, *MdVHA-Bs* and *MdVHP1*, and the vacuolar malate channel *MdALMT9* as  
571 well as malate-associated MYB TF *MdMYB73*.

572 **C,** Malate contents under different concentrations of exogenous nitrate.

573 **D,** Bafilomycin A1-sensitive ATP hydrolytic activity of V-ATPase under different  
574 concentrations of exogenous nitrate.

575 **E,** Proton-pumping activity of V-ATPase under different concentrations of exogenous



576 nitrate was measured by tracking the ATP-dependent quenching of acridine orange  
577 using a fluorescence spectrometer with excitation at 493 nm and emission at 545 nm.  
578 **F**, V-PPase activity under different concentrations of exogenous nitrate.  
579 **G**, Emission intensities of protoplast vacuoles under different concentrations of  
580 exogenous nitrate loaded with BCECF at 488 nm (first column) and 458 nm (second  
581 column). Scale bar = 10  $\mu$ m.  
582 **H**, Quantification of the pH in vacuoles under different concentrations of exogenous  
583 nitrate. Significant difference was detected by *t*-test. \* $P < 0.05$ , \*\* $P < 0.01$ .

584

585 **Figure 2. BTB/TAZ protein MdbT2 controls malate accumulation in response to**  
586 **nitrate.**

587 **A**, Malate contents in WT and transgenic apple plantlets under different  
588 concentrations of exogenous nitrate. ‘GL-3’ plantlets were treated with 0 N (0 N-WT).  
589 MdbT2 overexpression transgenic apple plantlets were treated with 0 N (0  
590 N-MdbT2-OX). The antiMdbT2 transgenic apple plantlets were treated with 5 N (5  
591 N-antiMdbT2).

592 **B**, Expression of *MdVHA-A*, *MdVHP1* and *MdALMT9* in WT and transgenic apple  
593 plantlets under different concentrations of exogenous nitrate using qPCR.

594 **C to E**, The hydrolytic and proton-pumping activities of V-ATPase and V-PPase in  
595 WT and transgenic apple plantlets under different concentrations of exogenous nitrate.

596 **F**, Emission intensities of protoplast vacuoles loaded with BCECF at 488 nm and  
597 458nm. Scale bar = 10  $\mu$ m.

598 **G**, Quantification of the pH in vacuoles. Significant difference was detected by *t*-test.  
599 \* $P < 0.05$ , \*\* $P < 0.01$ .

600

601 **Figure 3. MdbT2 physically interacts with MdCibHLH1 via the conserved**  
602 **BTB/BACK domain.**

603 **A**, MdbT2 interacted with MdCibHLH1 in a Y2H assay. The full-length and the  
604 BTB/BACK domain of MdbT2 interacted with the MdCibHLH1 protein.

605 **B**, Pull-down assays of the interaction between MdbT2 and MdCibHLH1.  
606 MdbT2-GST was expressed by *E. coli* resulted in the precipitation of  
607 MdCibHLH1-HIS using anti-GST antibody and anti-HIS antibody, respectively. GST  
608 alone was used as the control.

609 **C**, BiFC assay showed the interaction between MdbT2 and MdCibHLH1 using

610 tobacco leaf cells. MdBT2-nYFP and MdCibHLH1-cYFP interacted in the nucleus of  
611 tobacco leaf cells. Scale bar = 10  $\mu$ m.

612

613 **Figure 4. MdCibHLH1 is involved in regulating of malate accumulation.**

614 **A**, Malate contents in ‘GALA’ and *MdCibHLH1-OVXs* transgenic apple fruits  
615 (*MdCibHLH1-OVXs*) in the whole fruit developmental stages.

616 **B**, The ‘GALA’ and *MdCibHLH1-OVXs* taken in 40 DAF.

617 **C**, The expression of *MdVHA-A*, *MdVHA-B1*, *MdVHP1*, *MdALMT9* and *MdMYB73* in  
618 ‘GALA’ and *MdCibHLH1-OVXs*.

619 **D to F**, The hydrolytic and proton-pumping activities of V-ATPase and V-PPase in  
620 ‘GALA’ and *MdCibHLH1-OVXs*.

621 **G**, Emission intensities of protoplast vacuoles in ‘GALA’ and *MdCibHLH1-OVXs*  
622 with BCECF at 488 nm and 458 nm. Scale bar = 10  $\mu$ m.

623 **H**, Quantification of the pH in vacuoles in ‘GALA’ and *MdCibHLH1-OVXs*.  
624 Significant difference was detected by *t*-test. \* $P < 0.05$ , \*\* $P < 0.01$ .

625

626 **Figure 5. MdBT2 affects the stability of MdCibHLH1 protein.**

627 **A**, The cell-free degradation assays of the prokaryon-expressed and purified  
628 *MdCibHLH1-HIS* fusion proteins were using protein samples extracted from WL,  
629 35S::*MdBT2* and 35S::*anti-MdBT2*.

630 **B**, Three types of transgenic calli, that is, 35S::*MdCibHLH1-GFP*,  
631 35S::*MdBT2-MYC* + 35S::*MdCibHLH1-GFP* and 35S::*anti-MdBT2* +  
632 35S::*MdCibHLH1-GFP* were obtained and used for immunoblotting assays with an  
633 anti-GFP antibody.

634 **C**, The cell-free degradation assays were also performed using  
635 35S::*MdCibHLH1-GFP* and 35S::*MdBT2-MYC* + 35S::*MdCibHLH1-GFP*. Total  
636 proteins were analyzed by immunoblotting using the anti-GFP antibody. ACTIN was  
637 used as the loading control.

638

639 **Figure 6. MdBT2 is involved in the ubiquitination and degradation of**  
640 **MdCibHLH1 proteins.**

641 **A**, 35S::*MdCibHLH1-GFP* were treated with CHX and MG132 for 6h and then  
642 measured the *MdCibHLH1-GFP* protein level using anti-GFP antibody.

643 **B to E**, *MdBT2* promoted the ubiquitination of *MdCibHLH1* protein *in vitro* and *in vivo*.

644 **B and C**, The MdBt2-MYC active protein extracted from 35S::MdBt2-MYC were  
645 co-incubated with prokaryon-expressed and purified MdCibHLH1-HIS protein, E1,  
646 E2 and ubi *in vitro* for immunoprecipitation using anti-HIS and anti-ubi antibodies.

647 **D and E**, Ubiquitination assays *in vivo* were measured using 35S::MdCibHLH1-GFP,  
648 35S::MdCibHLH1-GFP + 35S::MdBt2-MYC and 35S::MdCibHLH1-GFP +  
649 35S::anti-MdBt2. The anti-GFP antibody and anti-ubi antibodies were used to detect  
650 the MdCibHLH1-GFP proteins accumulation. IP, Immunoprecipitated. IB,  
651 immunoblotted.

652

653 **Figure 7. Nitrate participates in the regulation of MdBt2-mediated**  
654 **MdCibHLH1 protein stability.**

655 **A**, The protein stability of MdCibHLH1 in response to nitrate. 35S::  
656 MdCibHLH1-GFP were incubated without nitrate (-N) and with nitrate (+N)  
657 respectively. The total proteins extracted from these calli samples were then used for  
658 immunoblotting assays with anti-GFP antibody.

659 **B and C**, The immunoblotting assays were conducted using 35S::MdCibHLH1-GFP  
660 treated with or without nitrate.

661

662 **Figure 8. MdBt2 modulates malate accumulation in an MdCibHLH1-dependent**  
663 **manner.**

664 **A**, Viral vector-based method was applied to apple injection assays. TRV, TRV1 +  
665 TRV2; MdBt2-TRV, TRV1 + MdBt2-TRV2; MdCibHLH1-TRV, TRV1 +  
666 MdCibHLH1-TRV2; MdBt2-TRV2 + MdCibHLH1-TRV2, TRV1 + MdBt2-TRV2 +  
667 MdCibHLH1-TRV2.

668 **B**, The qPCR analysis of the expression of *MdVHA-A*, *MdVHPI* and *MdALMT9*.

669 **C to F**, The malate contents, hydrolytic and proton-pumping activities of V-ATPase  
670 and V-PPase were measured in apple fruit tissues around the sites infiltrated with the  
671 different viral constructs. Significant difference was detected by *t*-test. \*P < 0.05, \*\*P  
672 < 0.01.

673

674 **Figure 9. Work model demonstrating that BTB-TAZ protein MdBt2**  
675 **ubiquitinates and degrades MdCibHLH1 in response to high nitrate, whereas**  
676 **MdBt2 cannot ubiquitinate MdCibHLH1 in low nitrate to regulate target gene**  
677 **activity of MdMYB73 to modulate malate accumulation for fruit quality.**

678

679

## Parsed Citations

**An JP, Zhang XW, Bi SQ, You CX, Wang XF, Hao YJ (2019) MdbHLH93, an apple activator regulating leaf senescence, is regulated by ABA and MdbT2 in antagonistic ways. *New Phytol* 222:735-751**

Pubmed: [Author and Title](#)

Google Scholar: [Author Only](#) [Title Only](#) [Author and Title](#)

**Bai Y, Dougherty L, Cheng LL, Xu KN (2015). A co-expression gene network associated with developmental regulation of apple fruit acidity. *Mol Genet Genomics* 290: 1247-1263**

Pubmed: [Author and Title](#)

Google Scholar: [Author Only](#) [Title Only](#) [Author and Title](#)

**Burdon J, Lallu N, Yearsley C, Osman S, Billing D, Bolding H (2007) Postharvest conditioning of Satsuma mandarins for reduction of acidity and skin puffiness. *Postharvest Biol and Tec* 43: 102-114**

Pubmed: [Author and Title](#)

Google Scholar: [Author Only](#) [Title Only](#) [Author and Title](#)

**Butelli E, Licciardello C, Ramadugu C, Durand-Hulak M, Celant A, Recupero GR, Martin C (2019) Noemi controls production of flavonoid pigments and fruit acidity and illustrates the domestication routes of modern citrus varieties. *Curr Biol* 29: 158-164**

Pubmed: [Author and Title](#)

Google Scholar: [Author Only](#) [Title Only](#) [Author and Title](#)

**Buttrose MS, Hale CR, Kliewer WM (1971) Effect of temperature on the composition of Cabernet Sauvignon berries. *Am J Enol Viticult* 22: 71-75**

Pubmed: [Author and Title](#)

Google Scholar: [Author Only](#) [Title Only](#) [Author and Title](#)

**Centeno DC, Osorio S, Nunes-Nesi A, Bertolo AL, Carneiro RT, Araújo WL, Oliver SN (2011) Malate plays a crucial role in starch metabolism, ripening, and soluble solid content of tomato fruit and affects postharvest softening. *Plant Cell* 23: 162-184**

Pubmed: [Author and Title](#)

Google Scholar: [Author Only](#) [Title Only](#) [Author and Title](#)

**Chinnusamy V, Ohta M, Kanrar S, Lee BH, Hong X, Agarwal M, Zhu JK (2003) ICE1: a regulator of cold-induced transcriptome and freezing tolerance in Arabidopsis. *Gene Dev* 17: 1043-1054**

Pubmed: [Author and Title](#)

Google Scholar: [Author Only](#) [Title Only](#) [Author and Title](#)

**Etienne A, Génard M, Lobit P, Mbéguié-A-Mbéguié D, Bugaud C (2013) What controls fleshy fruit acidity? A review of malate and citrate accumulation in fruit cells. *J. Exp. Bot* 64: 1451-1469**

Pubmed: [Author and Title](#)

Google Scholar: [Author Only](#) [Title Only](#) [Author and Title](#)

**Eisenach C, Baetz U, Martinoia E (2014) Vacuolar proton pumping: more than the sum of its parts? *Trends Plant Sci.* 19: 344-346**

Pubmed: [Author and Title](#)

Google Scholar: [Author Only](#) [Title Only](#) [Author and Title](#)

**Feng XM, Zhao Q, Zhao LL, Qiao Y, Xie XB, Li HF, Hao YJ (2012) The cold-induced basic helix-loop-helix transcription factor gene MdC1bHLH1 encodes an ICE-like protein in apple. *BMC Plant Biol.* 12: 22**

Pubmed: [Author and Title](#)

Google Scholar: [Author Only](#) [Title Only](#) [Author and Title](#)

**Fernie AR, Martinoia E (2009) Malate. Jack of all trades or master of a few? *Phytochemistry* 70: 828-832**

Pubmed: [Author and Title](#)

Google Scholar: [Author Only](#) [Title Only](#) [Author and Title](#)

**Finkemeier I and Sweetlove LJ (2009) The role of malate in plant homeostasis. *F1000 Biol. Rep* 1: 47**

Pubmed: [Author and Title](#)

Google Scholar: [Author Only](#) [Title Only](#) [Author and Title](#)

**Friemert V, Heininger D, Kluge M, Ziegler H (1988) Temperature effects on malic-acid efflux from the vacuoles and on the carboxylation pathways in Crassulacean-acid-metabolism plants. *Planta* 174:453-461**

Pubmed: [Author and Title](#)

Google Scholar: [Author Only](#) [Title Only](#) [Author and Title](#)

**Hu DG, Sun CH, Ma QJ, You CX, Cheng LL, Hao YJ (2016a) MdMYB1 regulates anthocyanin and malate accumulation by directly facilitating their transport into vacuoles in apples. *Plant Physiol* 170: 1315-1330**

Pubmed: [Author and Title](#)

Google Scholar: [Author Only](#) [Title Only](#) [Author and Title](#)

**Hu DG, Sun CH, Sun MH, Hao YJ (2016b) MdSOS2L1 phosphorylates MdVHA-B1 to modulate malate accumulation in response to salinity in apple. *Plant Cell Rep* 35: 705-718**

Pubmed: [Author and Title](#)

Google Scholar: [Author Only](#) [Title Only](#) [Author and Title](#)

**Hu DG, Li YY, Zhang QY, Li M, Sun CH, Yu JQ, Hao YJ (2017) The R2R3-MYB transcription factor MdMYB73 is involved in malate accumulation and vacuolar acidification in apple. Plant J 91: 443-454**

Pubmed: [Author and Title](#)

Google Scholar: [Author Only](#) [Title Only](#) [Author and Title](#)

**Hu DG, Yu JQ, Han PL, Xie XB, Sun CH, Zhang QY, Hao YJ (2019) The regulatory module MdPUB29-MdbHLH3 connects ethylene biosynthesis with fruit quality in apple. New Phytol 221: 1966-1982**

Pubmed: [Author and Title](#)

Google Scholar: [Author Only](#) [Title Only](#) [Author and Title](#)

**Jia D, Shen F, Wang Y, Wu T, Xu X, Zhang X, Han ZH (2018) Apple fruit acidity is genetically diversified by natural variations in three hierarchical epistatic genes: MdSAUR37, MdPP2CH and MdALMTII. Plant J 95: 427-443**

Pubmed: [Author and Title](#)

Google Scholar: [Author Only](#) [Title Only](#) [Author and Title](#)

**Jia H, Hirano K, Okamoto G (1999) Effects of fertilizer levels on tree growth and fruit quality of 'Hakuho' peaches (*Prunus persica*). J Jpn Soc Hortic Sci 68: 487-493**

Pubmed: [Author and Title](#)

Google Scholar: [Author Only](#) [Title Only](#) [Author and Title](#)

**Kovermann P, Meyer S, Hortensteiner S, Picco C, Scholz-Starke J, Ravera S, Lee Y, Martinoia E (2007) The Arabidopsis vacuolar malate channel is a member of the ALMT family. Plant J 52: 1169-1180**

Pubmed: [Author and Title](#)

Google Scholar: [Author Only](#) [Title Only](#) [Author and Title](#)

**Li SJ, Yin XR, Wang WL, Liu XF, Zhang B, Chen KS (2017) Citrus CitNAC62 cooperates with CitWRKY1 to participate in citric acid degradation via up-regulation of CitAco3. J. Exp. Bot 68: 3419-3426**

Pubmed: [Author and Title](#)

Google Scholar: [Author Only](#) [Title Only](#) [Author and Title](#)

**Liu KH, Niu Y, Konishi M, Wu Y, Du H, Chung HS, Ishida T (2017) Discovery of nitrate-CPK-NLP signalling in central nutrient-growth networks. Nature 545: 311**

Pubmed: [Author and Title](#)

Google Scholar: [Author Only](#) [Title Only](#) [Author and Title](#)

**Lobit P, Genard M, Soing P, Habib R (2006) Modelling malic acid accumulation in fruits: relationships with organic acids, potassium, and temperature. J Exp Bot 57: 1471-1483**

Pubmed: [Author and Title](#)

Google Scholar: [Author Only](#) [Title Only](#) [Author and Title](#)

**Ma BQ, Liao L, Zheng HY, Chen J, Wu BH, Ogutu C, Li SH, Korban SS, Han YP (2015) Genes encoding aluminum-activated malate trans-porter II and their association with fruit acidity in apple. Plant Genome-US 8: 3**

Pubmed: [Author and Title](#)

Google Scholar: [Author Only](#) [Title Only](#) [Author and Title](#)

**Ma B, Liao L, Fang T, Peng Q, Ogutu C, Zhou H, Han YP (2019) A Ma10 gene encoding P-type ATP ase is involved in fruit organic acid accumulation in apple. Plant Biotechnol J 17: 674-686**

Pubmed: [Author and Title](#)

Google Scholar: [Author Only](#) [Title Only](#) [Author and Title](#)

**Maeda Y, Konishi M, Kiba T, Sakuraba Y, Sawaki N, Kurai T, Yanagisawa S (2018) ANIGT1-centred transcriptional cascade regulates nitrate signalling and incorporates phosphorus starvation signals in Arabidopsis. Nat commun 9: 1376**

Pubmed: [Author and Title](#)

Google Scholar: [Author Only](#) [Title Only](#) [Author and Title](#)

**Mandadi KK, Misra A, Ren S, McKnight TD (2009) BT2, a BTB protein, mediates multiple responses to nutrients, stresses, and hormones in Arabidopsis. Plant Physiol 150: 1930-1939**

Pubmed: [Author and Title](#)

Google Scholar: [Author Only](#) [Title Only](#) [Author and Title](#)

**Martinoia E, Maeshima M, Neuhaus HE (2007) Vacuolar transporters and their essential role in plant metabolism. J Exp Bot 58:83-102**

Pubmed: [Author and Title](#)

Google Scholar: [Author Only](#) [Title Only](#) [Author and Title](#)

**Murata N, Los DA (1997) Membrane fluidity and temperature perception. Plant Physiol 115: 875**

Pubmed: [Author and Title](#)

Google Scholar: [Author Only](#) [Title Only](#) [Author and Title](#)

**Radi M, Mahrouz M, Jaouad A, Amiot MJ (2003) Influence of mineral fertilization (NPK) on the quality of apricot fruit (cv. Canino). The effect of the mode of nitrogen supply. Agronomie 23: 737-745**

Pubmed: [Author and Title](#)

Google Scholar: [Author Only](#) [Title Only](#) [Author and Title](#)

**Reitz HJ, Koo RC (1960) Effect of nitrogen and potassium fertilisation OB yield, fruit quality, and leaf analysis of Valencia orange. In Proceedings. Am Soc HorticSci 75: 244-252**

Pubmed: [Author and Title](#)

Google Scholar: [Author Only](#) [Title Only](#) [Author and Title](#)

**Robert HS, Quint A, Brand D, Vivian-Smith A, Offringa R (2009) BTB and TAZ domain scaffold proteins perform a crucial function in Arabidopsis development. Plant J 58: 109-121**

Pubmed: [Author and Title](#)

Google Scholar: [Author Only](#) [Title Only](#) [Author and Title](#)

**Ruffner HP, Hawker JS, Hale CR (1976) Temperature and enzymic control of malate metabolism in berries of Vitis vinifera. Phytochemistry 15: 1877-1880**

Pubmed: [Author and Title](#)

Google Scholar: [Author Only](#) [Title Only](#) [Author and Title](#)

**Ruhl EH (1989) Effect of potassium and nitrogen supply on the distribution of minerals and organic acids and the composition of grape juice of Sultana vines. Austn J Exp Agr 29: 133-137**

Pubmed: [Author and Title](#)

Google Scholar: [Author Only](#) [Title Only](#) [Author and Title](#)

**Shiratake K and Martinoia E (2007) Transporters in fruit vacuoles. Plant Bio 24: 127-133**

Pubmed: [Author and Title](#)

Google Scholar: [Author Only](#) [Title Only](#) [Author and Title](#)

**Shi Y, Ding Y, Yang SH (2018) Molecular regulation of CBF signaling in cold acclimation. Trends Plant Sci 23: 623-637**

Pubmed: [Author and Title](#)

Google Scholar: [Author Only](#) [Title Only](#) [Author and Title](#)

**Spironello A, Quaggio JA, Teixeira LJ, Furlani PR, Sigrist JM (2004) Pineapple yield and fruit quality effected by NPK fertilization in a tropical soil. Rev brasa de frutic 26: 155-159**

Pubmed: [Author and Title](#)

Google Scholar: [Author Only](#) [Title Only](#) [Author and Title](#)

**Stitt M (1999) Nitrate regulation of metabolism and growth. Curr Opin Plant Biol 2: 178-186**

Pubmed: [Author and Title](#)

Google Scholar: [Author Only](#) [Title Only](#) [Author and Title](#)

**Sweetman C, Deluc LG, Cramer GR, Ford CM, Soole KL (2009) Regulation of malate metabolism in grape berry and other developing fruits. Phytochemistry 70: 1329-1344**

Pubmed: [Author and Title](#)

Google Scholar: [Author Only](#) [Title Only](#) [Author and Title](#)

**Terrier N, Sauvage FX, Romieu C (2001) Changes in acidity and in proton transport at the tonoplast of grape berries during development. Planta 213: 20-28**

Pubmed: [Author and Title](#)

Google Scholar: [Author Only](#) [Title Only](#) [Author and Title](#)

**Thakur A, Singh Z (2012) Responses of 'Spring Bright' and 'Summer Bright' nectarines to deficit irrigation: fruit growth and concentration of sugars and organic acids. Sci Hortic 135: 112-119**

Pubmed: [Author and Title](#)

Google Scholar: [Author Only](#) [Title Only](#) [Author and Title](#)

**Wu BH, Génard M, Lescouret F, Gomez L, Li SH (2002) Influence of assimilate and water supply on seasonal variation of acids in peach (cv Suncrest). J Sci Food Agr 82:1829-1836**

Pubmed: [Author and Title](#)

Google Scholar: [Author Only](#) [Title Only](#) [Author and Title](#)

**Wang HC, Ma FF, Cheng LL (2010) Metabolism of organic acids, nitrogen and amino acids in chlorotic leaves of 'Honeycrisp' apple (Malus domestica Borkh) with excessive accumulation of carbohydrates. Planta 232: 511-522**

Pubmed: [Author and Title](#)

Google Scholar: [Author Only](#) [Title Only](#) [Author and Title](#)

**Wang XF, An JP, Liu X, Su L, You CX, Hao YJ (2018) The nitrate-responsive protein MdBT2 regulates anthocyanin biosynthesis by interacting with the MdMYB1 transcription factor. Plant Physiol 178: 890-906**

Pubmed: [Author and Title](#)

Google Scholar: [Author Only](#) [Title Only](#) [Author and Title](#)

**Xie XB, Li S, Zhang RF, Zhao J, Chen YC, Zhao Q, Hao YJ (2012) The bHLH transcription factor MdbHLH3 promotes anthocyanin accumulation and fruit colouration in response to low temperature in apples. Plant Cell Environ 35: 1884-1897**

Pubmed: [Author and Title](#)

Google Scholar: [Author Only](#) [Title Only](#) [Author and Title](#)

**Yao YX, Li M, Liu Z, Hao YJ, Zhai H (2007) A novel gene, screened by cDNA-AFLP approach, contributes to lowering the acidity of fruit in apple. Plant Physiol Bioch 45: 139-145**

Pubmed: [Author and Title](#)

Google Scholar: [Author Only](#) [Title Only](#) [Author and Title](#)

**Ye J, Wang X, Hu T, Zhang F, Wang B, Li CX, Ye ZB (2017) An InDel in the promoter of Al-ACTIVATED MALATE TRANSPORTER9 selected during tomato domestication determines fruit malate contents and aluminum tolerance. Plant Cell 29: 2249-2268**

Pubmed: [Author and Title](#)

Google Scholar: [Author Only](#) [Title Only](#) [Author and Title](#)

**Zhao Q, Ren YR, Wang QJ, Wang XF, You CX, Hao YJ (2016) Ubiquitination-related MdbT scaffold proteins target a bHLH transcription factor for iron homeostasis. Plant Physiol 172:1973-1988**

Pubmed: [Author and Title](#)

Google Scholar: [Author Only](#) [Title Only](#) [Author and Title](#)

**Zhu F, Wen W, Fernie AR (2019) Finding noemi: The transcription factor mutations underlying trait differentiation amongst Citrus. Trends Plant Sci 24:384-386**

Pubmed: [Author and Title](#)

Google Scholar: [Author Only](#) [Title Only](#) [Author and Title](#)
